# Supplementary material for: Fullerene-C60 and PCBM as interlayers in regular and inverted lead-free PSCs using CH3NH3SnI3: an analysis of device performance and defect density dependence by SCAPS-1D
Source: Royal Society of Chemistry journal article supplement (doi:10.1039/d4ra00634h), 2024-01-01
Supplement: d4ra00634h1.pdf [file d4ra00634h1.pdf]

# Fullerene-C<sub>60</sub> and PCBM as interlayers in regular and inverted lead-free PSCs using CH<sub>3</sub>NH<sub>3</sub>SnI<sub>3</sub>: An analysis of device performance and defect density dependence by SCAPS-1D

Vívian Helene Diniz Araújo, Ana Flávia Nogueira  
 Juliana Cristina Tristão and Leandro José dos Santos

## 1 Electronic Supplementary Information (ESI)

Table S1: Input parameters of PEDOT:PSS, Spiro-MeOTAD and TiO<sub>2</sub> for the subsection 3.1 simulations.

| Parameters/Materials                                              | PEDOT:PSS               | Spiro-MeOTAD            | TiO <sub>2</sub>        |
|-------------------------------------------------------------------|-------------------------|-------------------------|-------------------------|
|                                                                   | [2]                     | [1]                     | [1]                     |
| Thickness (nm)                                                    | 200                     | 200                     | 30                      |
| E <sub>g</sub> (eV)                                               | 2.20                    | 3.17                    | 3.20                    |
| χ (eV)                                                            | 2.90                    | 2.05                    | 4.26                    |
| ε <sub>r</sub>                                                    | 3.00                    | 3.00                    | 9.00                    |
| N <sub>c</sub> (cm <sup>-3</sup> )                                | 2.2x10 <sup>15</sup>    | 2.50 x 10 <sup>18</sup> | 2.00 x 10 <sup>18</sup> |
| N <sub>v</sub> (cm <sup>-3</sup> )                                | 1.8x10 <sup>18</sup>    | 1.80 x 10 <sup>19</sup> | 1.80 x 10 <sup>19</sup> |
| μ <sub>e</sub> (cm <sup>2</sup> V <sup>-1</sup> s <sup>-1</sup> ) | 1.00 x 10 <sup>-2</sup> | 2.00 x 10 <sup>-4</sup> | 20                      |
| μ <sub>h</sub> (cm <sup>2</sup> V <sup>-1</sup> s <sup>-1</sup> ) | 2.00 x 10 <sup>-4</sup> | 2.00 x 10 <sup>-4</sup> | 10                      |
| N <sub>A</sub> (cm <sup>-3</sup> )                                | 1.0x10 <sup>15</sup>    | 1.00 x 10 <sup>17</sup> | -                       |
| N <sub>D</sub> (cm <sup>-3</sup> )                                | -                       | -                       | 1.00 x 10 <sup>16</sup> |
| N <sub>t</sub> (cm <sup>-3</sup> )                                | 1.0x10 <sup>14</sup>    | 1.00 x 10 <sup>13</sup> | 1.00 x 10 <sup>15</sup> |

Table S2: PCE of simulated PSCs using different HTLs and ETLs for n-i-p and p-i-n PSCs with N<sub>t</sub>=4.5x10<sup>17</sup> cm<sup>-3</sup>. The perovskite thickness was 350 nm and the ETL/HTL thickness was 30 nm and 200 nm, respectively.

| HTL/ETL<br>Regular PSC | TiO <sub>2</sub> | ZnO   | HTL/ETL<br>Inverted PSC | TiO <sub>2</sub> | ZnO   |
|------------------------|------------------|-------|-------------------------|------------------|-------|
| Spiro-MeOTAD           | 6.12%            | 6.40% | PEDOT:PSS               | 1.17%            | 1.10% |
| CuI                    | 6.54%            | 6.89% | CuI                     | 1.06%            | 1.35% |

Table S3: Influence of MASI thickness in simulated PSCs with CuI and ZnO as HTL/ETL (30 nm) in regular and inverted configurations, using N<sub>t</sub>=4.5x10<sup>17</sup> cm<sup>-3</sup>.

| PSC n-i-p           | V <sub>oc</sub> (V) | J <sub>sc</sub> (mA/cm <sup>2</sup> ) | FF (%) | PCE (%) | PSC p-i-n           | V <sub>oc</sub> (V) | J <sub>sc</sub> (mA/cm <sup>2</sup> ) | FF (%) | PCE (%) |
|---------------------|---------------------|---------------------------------------|--------|---------|---------------------|---------------------|---------------------------------------|--------|---------|
| CuI/MASI(150nm)/ZnO | 0.66                | 17.20                                 | 49.97  | 5.70    | CuI/MASI(150nm)/ZnO | 0.65                | 15.35                                 | 37.25  | 3.72    |
| CuI/MASI(200nm)/ZnO | 0.68                | 17.53                                 | 54.60  | 6.53    | CuI/MASI(200nm)/ZnO | 0.65                | 10.87                                 | 43.00  | 3.05    |
| CuI/MASI(250nm)/ZnO | 0.68                | 18.28                                 | 54.40  | 6.81    | CuI/MASI(250nm)/ZnO | 0.64                | 8.42                                  | 45.24  | 2.45    |
| CuI/MASI(300nm)/ZnO | 0.68                | 18.61                                 | 53.96  | 6.88    | CuI/MASI(300nm)/ZnO | 0.63                | 6.57                                  | 44.83  | 1.86    |
| CuI/MASI(350nm)/ZnO | 0.68                | 18.69                                 | 53.82  | 6.89    | CuI/MASI(350nm)/ZnO | 0.62                | 4.96                                  | 45.12  | 1.38    |
| CuI/MASI(400nm)/ZnO | 0.68                | 18.71                                 | 53.79  | 6.90    | CuI/MASI(400nm)/ZnO | 0.61                | 3.73                                  | 45.79  | 1.03    |
| CuI/MASI(450nm)/ZnO | 0.68                | 18.71                                 | 53.79  | 6.90    | CuI/MASI(450nm)/ZnO | 0.59                | 2.83                                  | 46.57  | 0.78    |
| CuI/MASI(500nm)/ZnO | 0.68                | 18.71                                 | 53.79  | 6.90    | CuI/MASI(500nm)/ZnO | 0.58                | 2.17                                  | 47.34  | 0.60    |
| CuI/MASI(550nm)/ZnO | 0.68                | 18.72                                 | 53.78  | 6.90    | CuI/MASI(550nm)/ZnO | 0.57                | 1.68                                  | 48.03  | 0.46    |
| CuI/MASI(600nm)/ZnO | 0.68                | 18.72                                 | 53.78  | 6.90    | CuI/MASI(600nm)/ZnO | 0.56                | 1.33                                  | 48.66  | 0.36    |
| CuI/MASI(650nm)/ZnO | 0.68                | 18.72                                 | 53.78  | 6.90    | CuI/MASI(650nm)/ZnO | 0.55                | 1.06                                  | 49.23  | 0.28    |
| CuI/MASI(700nm)/ZnO | 0.68                | 18.72                                 | 53.77  | 6.90    | CuI/MASI(700nm)/ZnO | 0.54                | 0.85                                  | 49.72  | 0.23    |
| CuI/MASI(750nm)/ZnO | 0.68                | 18.72                                 | 53.77  | 6.90    | CuI/MASI(750nm)/ZnO | 0.53                | 0.69                                  | 50.19  | 0.18    |
| CuI/MASI(800nm)/ZnO | 0.68                | 18.72                                 | 53.77  | 6.90    | CuI/MASI(800nm)/ZnO | 0.52                | 0.57                                  | 50.58  | 0.15    |

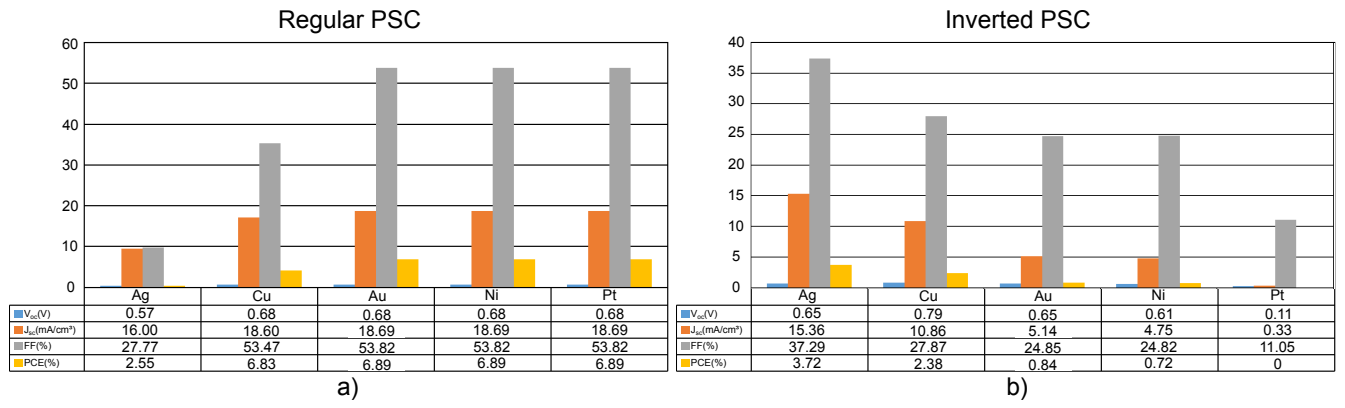

Figure S1: Output parameters varying back metal contacts in a) regular and b) inverted PSCs

Table S4: PCE in regular and inverted configurations using  $N_t=4.5 \times 10^{13} \text{ cm}^{-3}$ , with and without interlayers.

| PSC                           | Conf. | $V_{oc}$ (V) | $J_{sc}$ (mA/cm <sup>2</sup> ) | FF (%) | PCE (%) |
|-------------------------------|-------|--------------|--------------------------------|--------|---------|
| CuI/MASI/ZnO                  | n-i-p | 1.02         | 33.81                          | 83.13  | 28.64   |
| CuI/MASI/PCBM/ZnO             | n-i-p | 1.02         | 33.84                          | 83.10  | 28.65   |
| CuI/MASI/C <sub>60</sub> /ZnO | n-i-p | 1.02         | 33.92                          | 77.78  | 26.92   |
| CuI/MASI/ZnO                  | p-i-n | 1.02         | 32.26                          | 84.33  | 27.71   |
| CuI/MASI/PCBM/ZnO             | p-i-n | 1.02         | 32.38                          | 84.17  | 27.80   |
| CuI/MASI/C <sub>60</sub> /ZnO | p-i-n | 1.02         | 32.26                          | 79.01  | 25.99   |

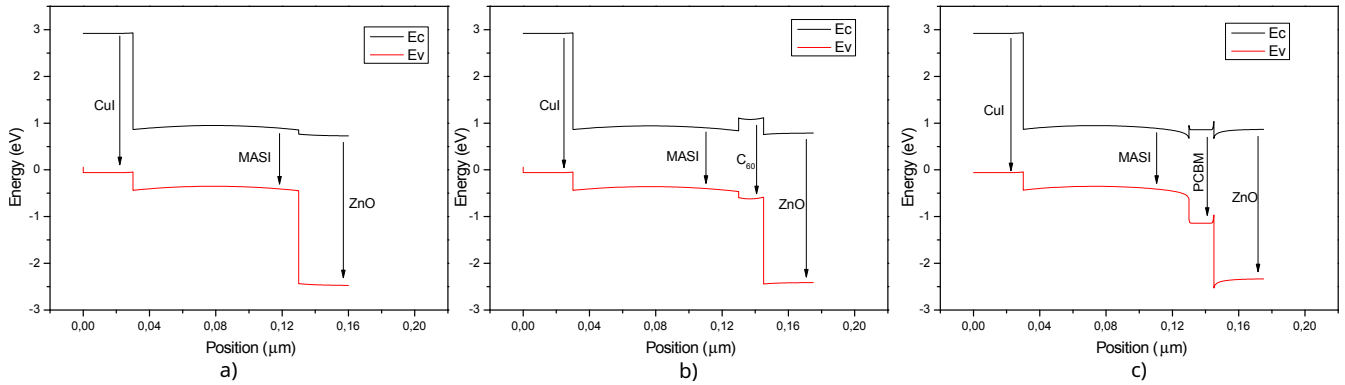

Figure S2: Energy diagram of simulated inverted PSCs. a) CuI/MASI/ZnO, b) CuI/MASI/C<sub>60</sub>/ZnO, c) CuI/MASI/PCBM/ZnO, using  $N_t=4.5 \times 10^{17} \text{ cm}^{-3}$  and MASI thickness at 150 nm.

## References

- [1] H.-J. Du, W.-C. Wang, and J.-Z. Zhu. Device simulation of lead-free  $\text{CH}_3\text{NH}_3\text{SnI}_3$  perovskite solar cells with high efficiency. *Chinese Physics B*, 25(10):108802, 2016.
- [2] H. Sharma, V. K. Verma, R. C. Singh, P. K. Singh, and A. Basak. Numerical analysis of high-efficiency  $\text{CH}_3\text{NH}_3\text{PbI}_3$  perovskite solar cell with pedot: Pss hole transport material using scaps 1d simulator. *Journal of Electronic Materials*, pages 1–13, 2023.
